# Supplementary material for: Control of cell proliferation in E-jet 3D-printed scaffolds for tissue engineering applications: the influence of the cell alignment angle
Source: Royal Society of Chemistry journal article supplement (doi:10.1039/c7tb00377c), 2017-01-01
Supplement: c7tb00377c1.pdf [file c7tb00377c1.pdf]

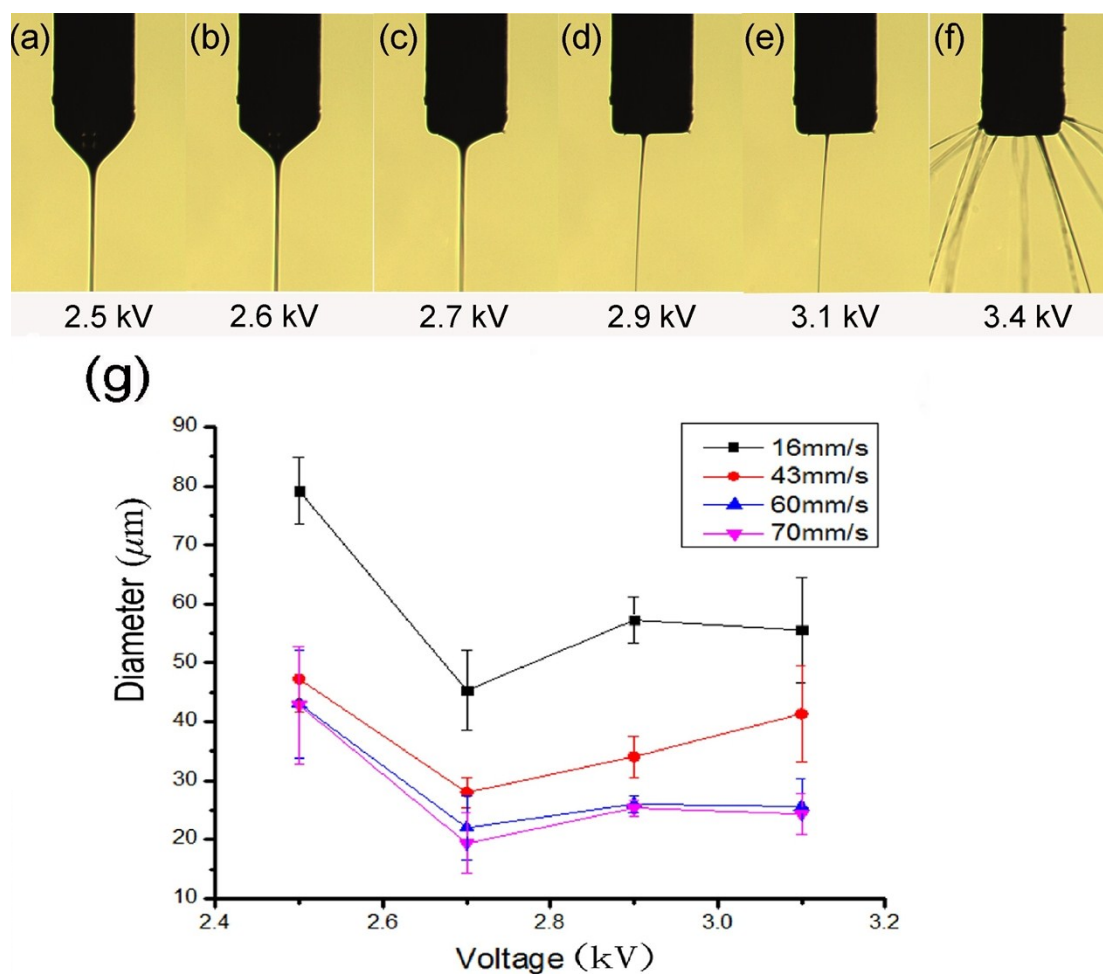

**Fig. S1.** E-jet printing process and printed filaments under different applied voltages (2.5–3.4 kV). (a–e) The shape of the jet changes with the increasing voltage. (f) Unstable multi-jets at high electric fields. (g) Printed filament width at different voltages using an 8% w/v PLGA solution.
